# Supplementary material for: A NiCo alloy particle-decorated TiO2 nanoarray as an efficient electrocatalyst for nitrite reduction to ammonia
Source: Royal Society of Chemistry journal article supplement (doi:10.1039/d5cc00125k), 2025-01-01
Supplement: d5cc00125k1.pdf [file d5cc00125k1.pdf]

## Supplementary Information

### Experimental section

**Materials:** trisodium citrate dihydrate ( $C_6H_5Na_3O_7 \cdot 2H_2O$ ), ethyl alcohol ( $C_2H_5OH$ ), Sodium hydroxide (NaOH), nickel sulfate ( $NiSO_4 \cdot 6H_2O$ ), Sodium nitrite ( $NaNO_2$ ), hydrochloric acid (HCl), deionized water ( $H_2O$ ), salicylic acid ( $C_7H_6O_3$ ), ammonium chloride ( $NH_4Cl$ ), hydrofluoric acid (HF), potassium hydroxide (KOH), acetone ( $CH_3COCH_3$ ), sodium hypochlorite solution (NaClO), nitric acid ( $HNO_3$ ), cobaltous chloride ( $CoCl_2 \cdot 6H_2O$ ), sodium sulfate anhydrous ( $Na_2SO_4$ ), sodium nitroferricyanide dihydrate ( $C_5FeN_6Na_2O \cdot 2H_2O$ ). All the chemicals utilized were supplied by Chengdu Kelong Ltd in this work. A Zn plate (0.2 mm thick) and a Ti plate (0.5 mm thick) were purchased from Suzhou.

**Preparation of  $TiO_2$ :** Firstly, the Ti plate ( $2.0 \times 4.0 \text{ cm}^2$ ) was polished with sandpaper until its surface was smooth. Secondly, it was washed sequentially with acetone, alcohol, and deionized water for 10 min. Thirdly, the Ti plate was cleaned with a chemical solution ( $HF/HNO_3/H_2O = 1: 1: 1$ ) and then washed with deionized water. Fourthly, the clean Ti plate was put into an autoclave containing 5 M NaOH and kept at  $180^\circ\text{C}$  for 24 hours. After the autoclave was naturally cooled to room temperature, the impurities on the surface were alternately washed with deionized water and ethanol. After drying, the prepared  $Na_2Ti_2O_5$  nanoarrays were immersed in 1 M HCl for ion exchange, and the ion exchange process was kept for 2 h. Then, the obtained  $H_2Ti_2O_5$  nanoarrays were washed with deionized water and ethanol. Finally, to get  $TiO_2$  nanograin arrays,  $H_2Ti_2O_5$  nanoarrays were annealed in a tube furnace at  $450^\circ\text{C}$  for 2 h

under the atmosphere of Ar/H<sub>2</sub>.

**Preparation of NiCo-TiO<sub>2</sub>:** NiCo alloy was loaded on the surface of TiO<sub>2</sub> by electrodeposition. 0.13 M NiSO<sub>4</sub>·6H<sub>2</sub>O, 0.13 M Na<sub>2</sub>SO<sub>4</sub>, 0.1 M C<sub>6</sub>H<sub>5</sub>Na<sub>3</sub>O<sub>7</sub>·2H<sub>2</sub>O, and 0.09 M CoCl<sub>2</sub>·6H<sub>2</sub>O were dissolved in 50 mL deionized water as the electrolyte for electrodeposition. Using a carbon rod as the counter electrode, a calomel electrode as the reference electrode, and a TiO<sub>2</sub> plate as the working electrode, polarize at 60 mA cm<sup>-2</sup> for 5 min in the above solution. Finally, the Ti plate was taken out and rinsed with water to obtain NiCo-TiO<sub>2</sub>.

**Characterizations:** XRD data were acquired by an X-ray diffractometer with Cu K $\alpha$  radiation (DX-2700B). SEM measurements were carried out on an X-ray diffractometer with Cu K $\alpha$  radiation (DX-2700B). The absorbance data were measured on UV-vis spectrophotometer of SHIMADZU UV-2600. TEM image was obtained from an atomic-resolution scanning transmission electron microscopy (FEI Talos F200S Super) operated at 200 kV. XPS measurements were performed with Thermo Fischer ESCALAB Xi<sup>+</sup>.

**Electrochemical measurements:** All electrochemical measurements were performed on the CHI 660E electrochemical workstation (Shanghai, Chenhua) using a standard Nafion 117 membrane separated H-type three-electrode electrolytic bath. The electrolyte solution consisted of 0.1 M NaOH and 0.1 M NaNO<sub>2</sub> using NiCo-TiO<sub>2</sub> as the working electrode, graphite rod as the counter electrode, and saturated mercury oxide electrode as the reference electrode. All potentials reported in the work were calibrated for conversion to a reversible hydrogen electrode (RHE). The scanning rate

of LSV is  $5\text{ mV s}^{-1}$ , and the potential window is  $-0.2\text{ V}$  to  $-0.7\text{ V}$ . The catalyst material of the working electrode was immersed in the electrolyte with an area of  $0.25\text{ cm}^2$ .

**Determination of  $\text{NH}_3$ :** The  $\text{NH}_3$  concentration in the solution was determined by colorimetry (the obtained electrolyte was diluted 50 times) using the indophenol blue method. In detail, 2 mL of the solution after the reaction was mixed with 2 mL of 1 M NaOH coloring solution containing 5%  $\text{C}_7\text{H}_5\text{NaO}_3$  and 5%  $\text{C}_6\text{H}_5\text{Na}_3\text{O}_7 \cdot 2\text{H}_2\text{O}$ . Then, 1 mL oxidizing solution of 0.05 M NaClO and 0.2 mL catalyst solution of  $\text{C}_5\text{FeN}_6\text{Na}_2\text{O}$  (1 wt%) were added to the above solution. After standing in the dark for 2 h, the UV-vis absorption spectra were measured. The concentration of  $\text{NH}_3$  was identified using the absorbance at a wavelength of 655 nm. The concentration-absorbance curve was calibrated using the standard  $\text{NH}_4\text{Cl}$  solution with  $\text{NH}_3$  concentrations of 0, 0.2, 0.5, 1.0, 2.0, 3.0, and 5.0 ppm in 0.1 M NaOH solution. The fitting curve in Fig. S5 ( $y = 0.32909x + 0.04845$ ,  $R^2 = 0.9996$ ) shows a good linear relation of absorbance value with  $\text{NH}_3$  concentration.

**Determination of FE and  $\text{NH}_3$  yield:** The FE for  $\text{NO}_2^-$  reduction was defined as the amount of electric charge used for synthesizing  $\text{NH}_3$  divided by the total charge passed through the electrode during electrolysis.

FE toward  $\text{NH}_3$  via  $\text{NO}_2^-$ -RR is calculated by the following equation:

$$\text{FE} = (6 \times F \times C_{\text{NH}_3} \times V) / (M_{\text{NH}_3} \times Q) \times 100\%$$

The total amount of  $\text{NH}_3$  produced was measured using colorimetric methods. The yield rate of  $\text{NH}_3$  is calculated as follows:

$$\text{NH}_3 \text{ yield rate} = (C_{\text{NH}_3} \times V) / (M_{\text{NH}_3} \times t \times A)$$

Where  $F$  is the Faradaic constant ( $96485 \text{ C mol}^{-1}$ ),  $C_{\text{NH}_3}$  is the concentration of  $\text{NH}_3$ ,  $V$  is the volume of electrolyte in the anode compartment (45 mL),  $M_{\text{NH}_3}$  is the molar mass of  $\text{NH}_3$ ,  $Q$  is the total charge passing the electrode,  $t$  is the electrolysis time, and  $A$  is the geometric surface area ( $0.25 \text{ cm}^2$ ).

**Zn- $\text{NO}_2^-$  battery preparation:** Zn- $\text{NO}_2^-$  battery was assembled with NiCo-TiO<sub>2</sub> ( $0.25 \text{ cm}^2$ ) as the cathode and a polished Zn plate ( $0.25 \text{ cm}^2$ ) as the anode. A typical H-type cell that contains 45 mL cathode electrolyte (0.1 M NaOH + 0.1 M NaNO<sub>2</sub>) and 45 mL anode electrolyte (6 M KOH) separated by Nafion 117 membrane. Zn- $\text{NO}_2^-$  battery was tested at room temperature with a CHI 660E electrochemical workstation.

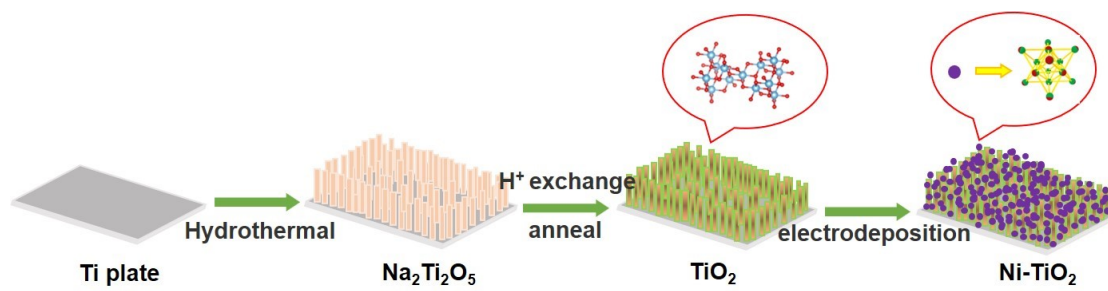

Fig. S1 Schematic diagram of the synthesis of NiCo-TiO<sub>2</sub>.

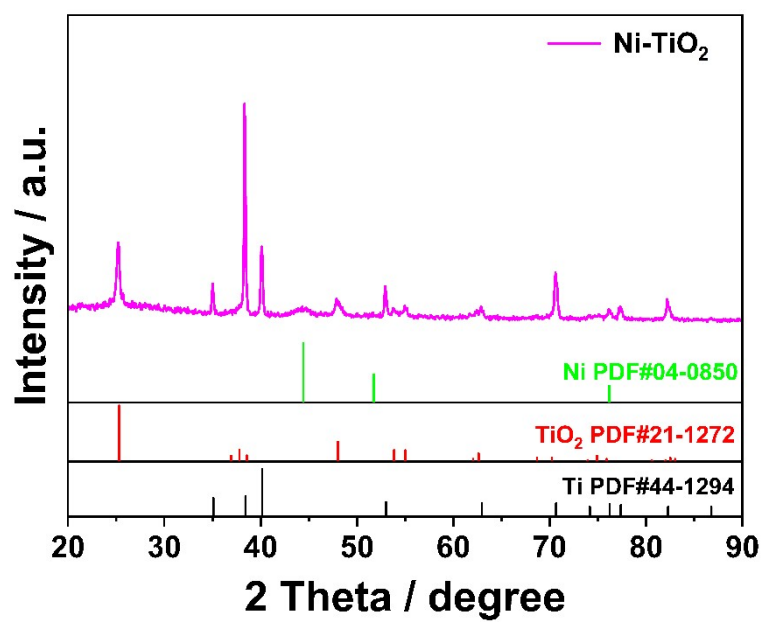

Fig. S2 XRD spectrum of Ni-TiO<sub>2</sub>.

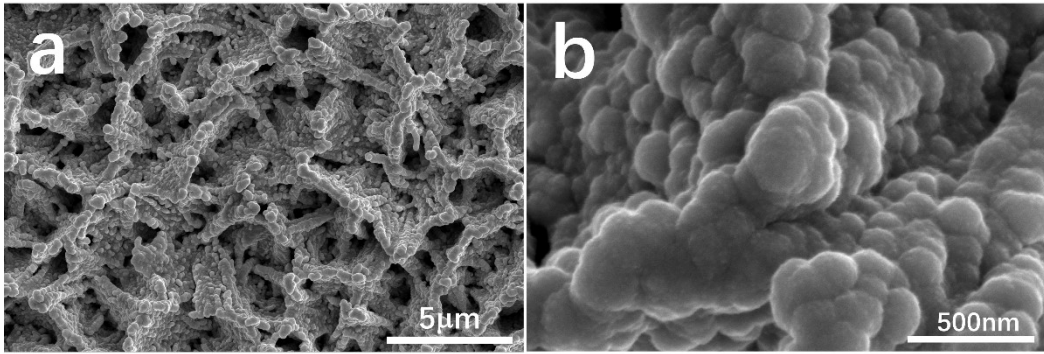

Fig. S3 SEM images of Ni-TiO<sub>2</sub>.

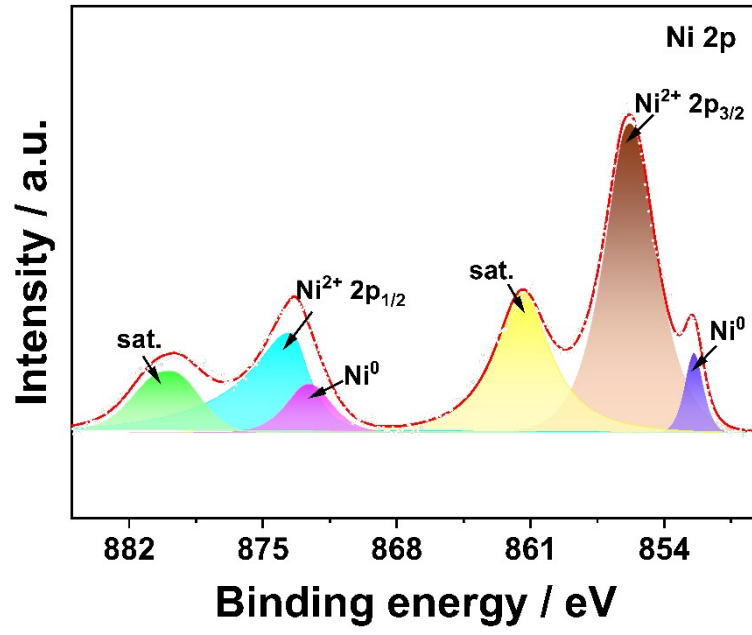

Fig. S4 XPS spectrum of Ni element in Ni-TiO<sub>2</sub>.



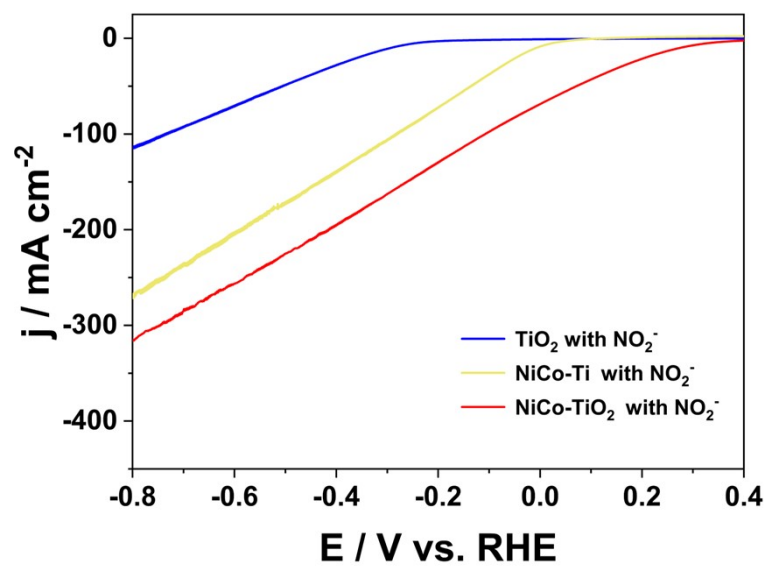

Fig. S5 LSV curves of NiCo-TiO<sub>2</sub>, NiCo-Ti, and TiO<sub>2</sub>.

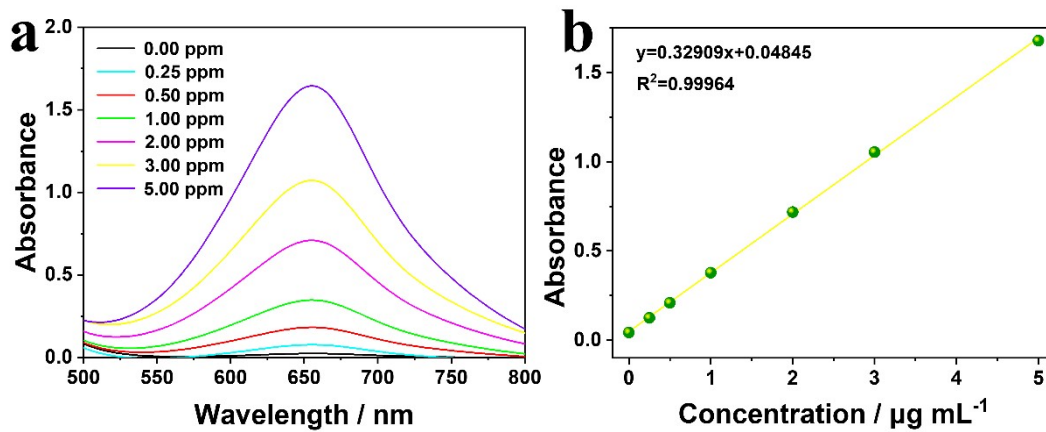

Fig. S6 (a) UV-vis absorption spectra and corresponding (b) calibration curve used for calculation of  $\text{NH}_3$  concentration.

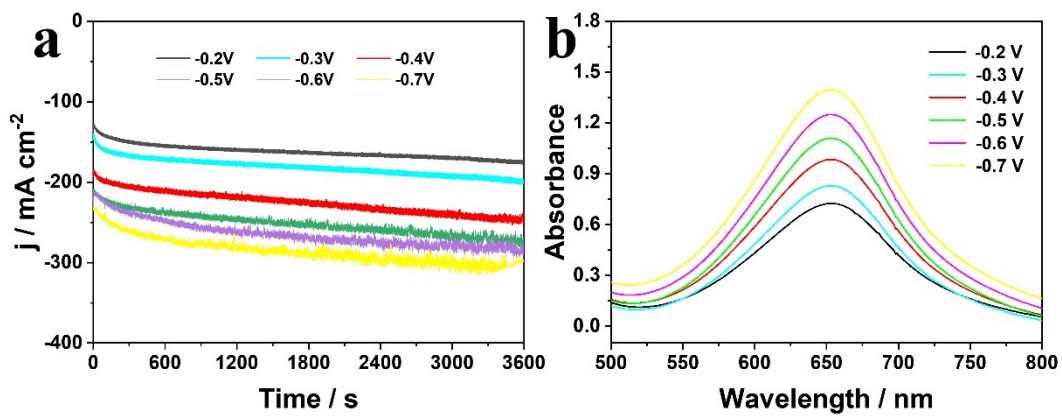

Fig. S7 (a) Chronoamperometry curves (from  $-0.2$  V to  $-0.7$  V) and (b) corresponding UV-vis absorption spectra of NiCo-TiO<sub>2</sub> for electrogenerated NH<sub>3</sub> at various potentials.

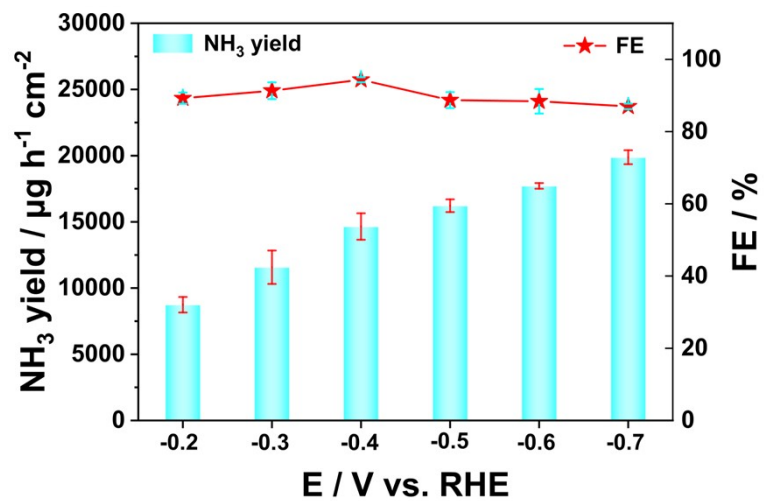

Fig. S8  $\text{NH}_3$  yields and FEs of Ni-TiO<sub>2</sub> at different potentials.

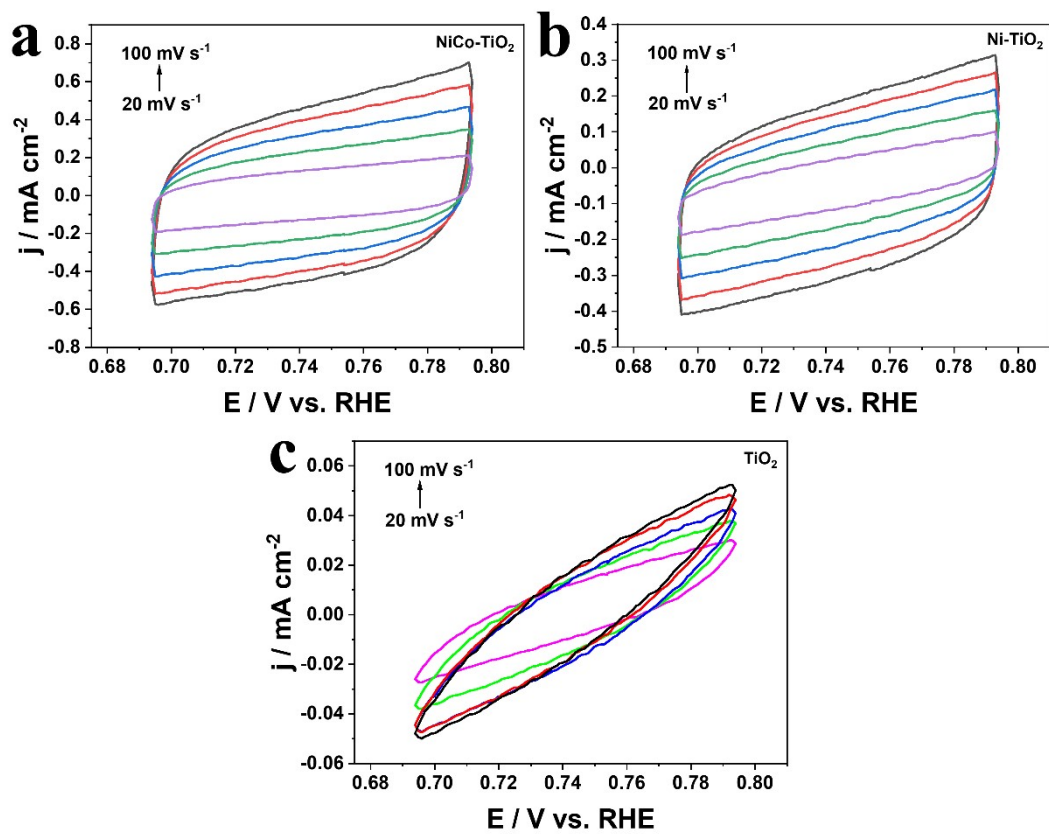

Fig. S9 Cyclic voltammety curves of NiCo-TiO<sub>2</sub>, Ni-TiO<sub>2</sub> and TiO<sub>2</sub> at different scan rates (20, 40, 60, 80, and 100  $\text{mV s}^{-1}$ ).

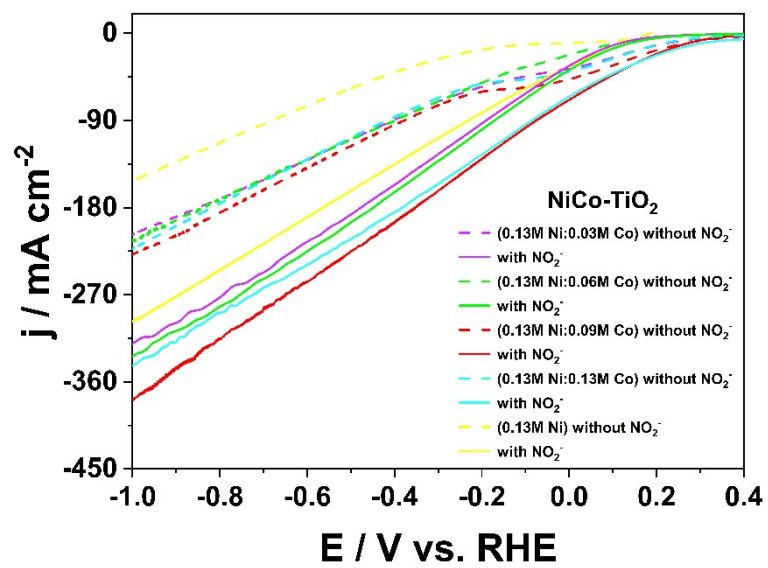

Fig. S10 LSV curve of NiCo-TiO<sub>2</sub> with different Ni/Co ratios in 0.1 M NaOH with and without 0.1 M NaNO<sub>2</sub>

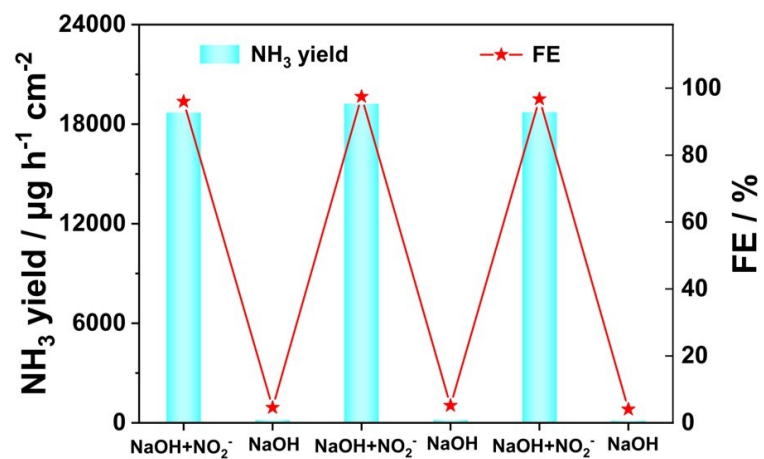

Fig.S11 NH<sub>3</sub> yields and FEs of NiCo-TiO<sub>2</sub> during the alternating cycling tests.

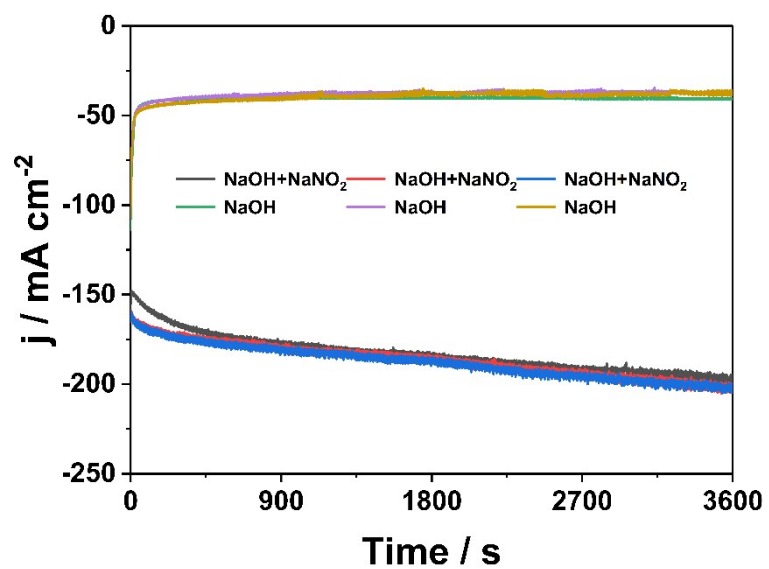

Fig.S12 Chronoamperometry curves of NiCo-TiO<sub>2</sub> for NH<sub>3</sub> generation during the alternating cycle experiments at -0.4 V.



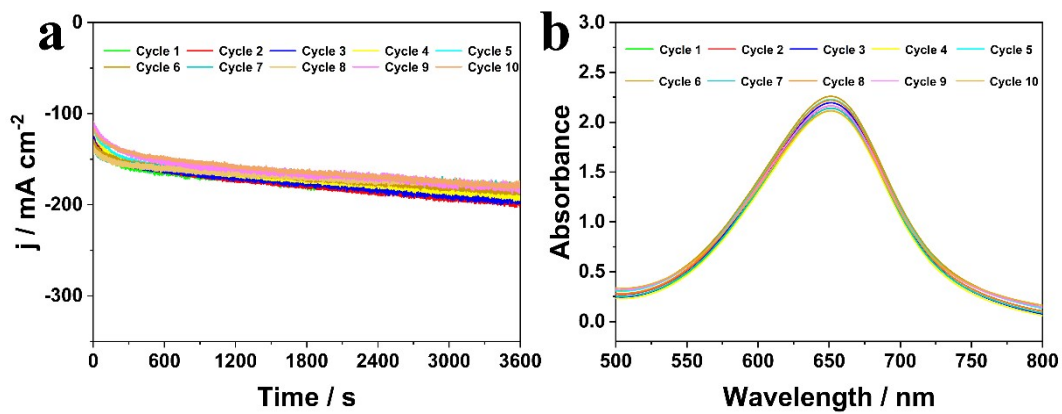

Fig. S13 (a) Chronoamperometry curves and (b) corresponding UV-vis absorption spectra of NiCo-TiO<sub>2</sub> for electrochemical catalytic production of NH<sub>3</sub> during recycling tests in 0.1 M NaOH with 0.1 M NO<sub>2</sub><sup>-</sup> at -0.4 V.

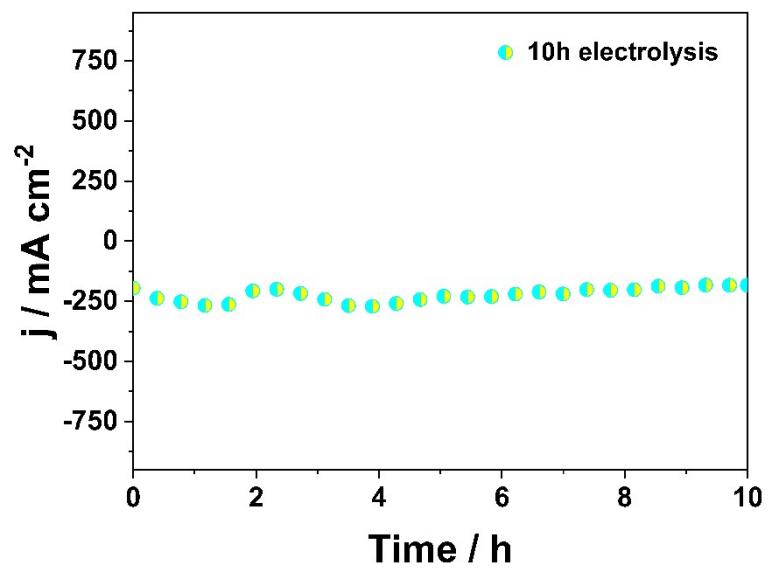

Fig. S14 Chronoamperometry curves of Ni-Mo-P/TiO<sub>2</sub> after 10 h electrolysis.

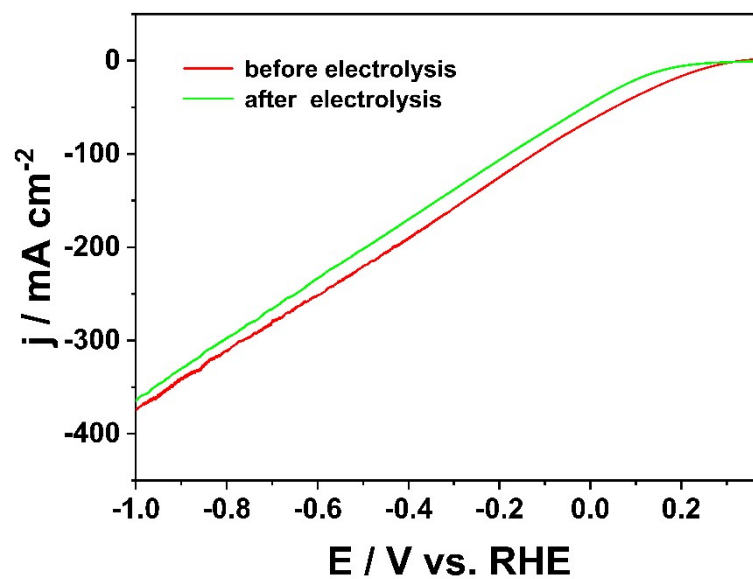

Fig. S15 LSV curves of NiCo-TiO<sub>2</sub> before and after 10 h electrolysis in 0.1 M NaOH with 0.1 M NO<sub>2</sub><sup>-</sup>.

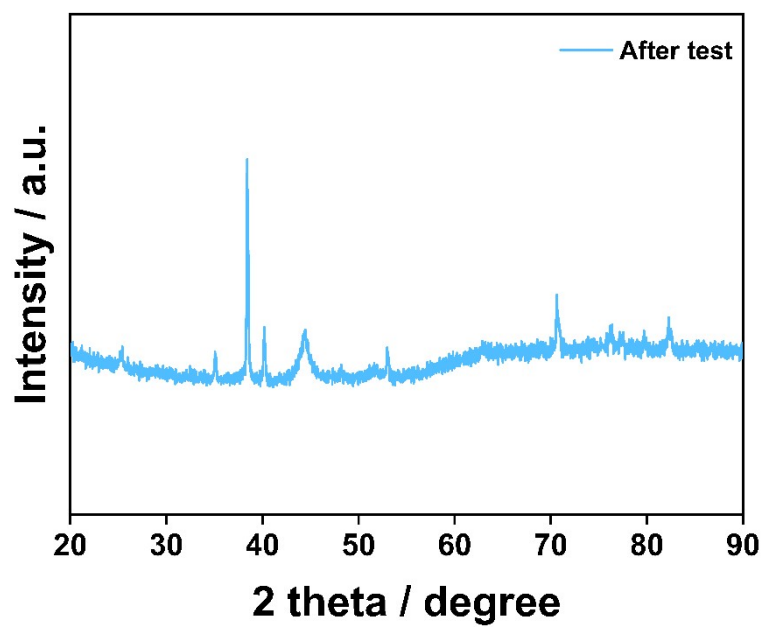

Fig. S16 XRD spectrum of NiCo-TiO<sub>2</sub> after continuous cycle tests.

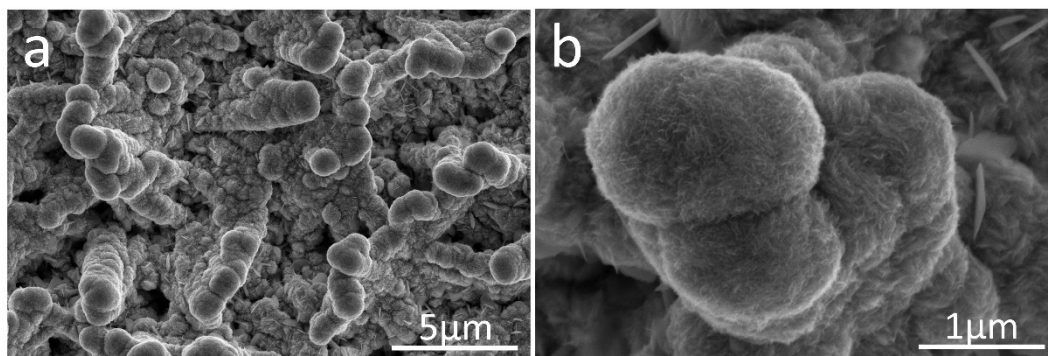

Fig. S17 SEM images for NiCo-TiO<sub>2</sub> after NO<sub>2</sub><sup>-</sup>RR electrolysis.

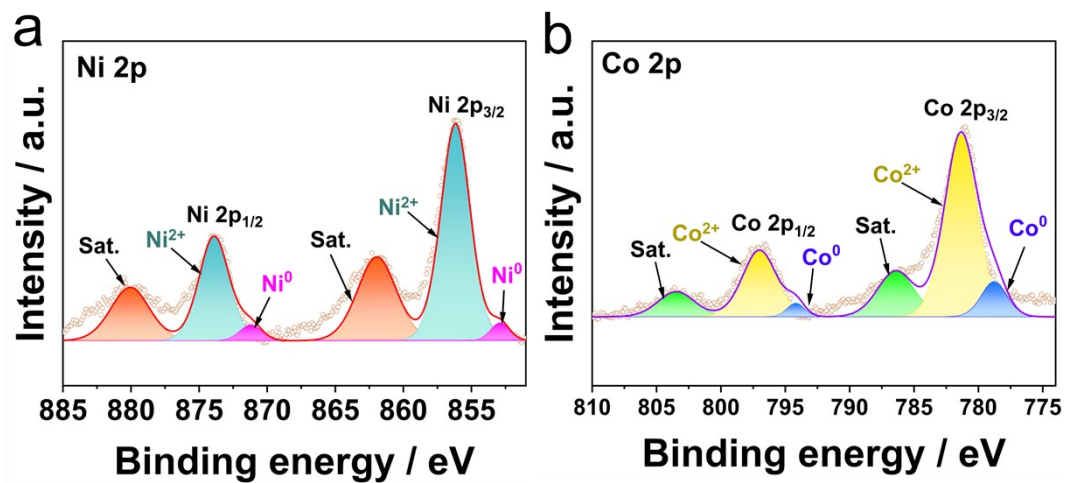

Fig. S18 The XPS spectra of (a) Ni 2p and (b) Co 2p regions of NiCo-TiO<sub>2</sub> after long-time electrolysis.

**Table S1.** Comparison of the catalytic performances of NiCo-TiO<sub>2</sub> with other reported NO<sub>2</sub><sup>-</sup>RR electrocatalysts under ambient conditions.

| Catalyst                           | Electrolyte                                                                    | Potential<br>(V vs. RHE) | NH <sub>3</sub> yield<br>(μg h <sup>-1</sup> cm <sup>-2</sup> ) | FE<br>(%) | Ref.      |
|------------------------------------|--------------------------------------------------------------------------------|--------------------------|-----------------------------------------------------------------|-----------|-----------|
| NiCo-TiO <sub>2</sub>              | 0.1 M NaOH<br>(0.1 M NO <sub>2</sub> <sup>-</sup> )                            | -0.4V                    | 18736.2                                                         | 97.5%     | This work |
| V-TiO <sub>2</sub> /TP             | 0.1 M NaOH<br>(0.1 M NO <sub>2</sub> <sup>-</sup> )                            | -0.6V                    | 7083.9                                                          | 93.2%     | 1         |
| Ni@TiO <sub>2</sub> /TP            | 0.1 M NaOH<br>(0.1 M NO <sub>2</sub> <sup>-</sup> )                            | -0.5V                    | 9667.8                                                          | 98.5%     | 2         |
| WO <sub>2</sub>                    | 0.1 M NaOH<br>(0.1 M NO <sub>2</sub> <sup>-</sup> )                            | -0.9V                    | 14964.25                                                        | 94.3%     | 3         |
| Ni-Mo-P/TiO <sub>2</sub>           | 0.1 M NaOH<br>(0.1 M NO <sub>2</sub> <sup>-</sup> )                            | -0.6V                    | 16124.76                                                        | 95.6%     | 4         |
| MoO <sub>2</sub>                   | 0.5 M Na <sub>2</sub> SO <sub>4</sub><br>(0.1 M NO <sub>2</sub> <sup>-</sup> ) | -0.8V                    | 8678.4                                                          | 94.5%     | 5         |
| NiWO <sub>4</sub>                  | 0.1 M NaOH<br>(0.1 M NO <sub>2</sub> <sup>-</sup> )                            | -0.4V                    | 10 974.36                                                       | 97.6%     | 6         |
| NiS <sub>2</sub> @TiO <sub>2</sub> | 0.1 M NaOH<br>(0.1 M NO <sub>2</sub> <sup>-</sup> )                            | -0.5V                    | 8251.8                                                          | 92.1%     | 7         |
| Ni <sub>2</sub> P<br>nanosheet     | 0.1 M PBS<br>(200 ppm NO <sub>2</sub> <sup>-</sup> )                           | -0.3V                    | 2692.2                                                          | 90.2%     | 8         |
| P-doped TiO <sub>2</sub>           | 0.1 M Na <sub>2</sub> SO <sub>4</sub><br>(0.1 M NO <sub>2</sub> <sup>-</sup> ) | -0.6V                    | 9533.6                                                          | 90.6%     | 9         |
| Cu <sub>3</sub> P@TiO <sub>2</sub> | 0.1 M NaOH<br>0.1 M NaNO <sub>2</sub>                                          | -0.7V                    | 22212.2                                                         | 97.1%     | 10        |
| A-TiO <sub>2-x</sub>               | 0.1 M NaOH<br>(0.1 M NO <sub>2</sub> <sup>-</sup> )                            | -0.8V                    | 12,230.1                                                        | 91.1%     | 11        |

|                         |                                                                                |       |          |        |    |
|-------------------------|--------------------------------------------------------------------------------|-------|----------|--------|----|
| Ni-TiO <sub>2</sub> /TP | 0.1 M NaOH<br>(0.1 M NO <sub>2</sub> <sup>-</sup> )                            | -0.5V | 6464.56  | 94.89% | 12 |
| CF@Cu <sub>2</sub> O    | 0.1 M PBS<br>(0.1 M NO <sub>2</sub> <sup>-</sup> )                             | -0.6V | 7510.73  | 94.21% | 13 |
| Ni@MDC                  | 0.1 M NaOH<br>(0.1 M NO <sub>2</sub> <sup>-</sup> )                            | -0.8V | 5100     | 65.4%  | 14 |
| Cu@TiO <sub>2</sub>     | 0.1 M Na <sub>2</sub> SO <sub>4</sub><br>(0.1 M NO <sub>2</sub> <sup>-</sup> ) | -0.6V | 8642.8   | 95.3%  | 15 |
| TiO <sub>2-x</sub>      | 0.1 M K <sub>2</sub> SO <sub>4</sub><br>(0.1 M NO <sub>2</sub> <sup>-</sup> )  | -0.7V | 7898     | 92.7%  | 16 |
| Ag@TiO <sub>2</sub> /TP | 0.1 M NaOH<br>(0.1 M NO <sub>2</sub> <sup>-</sup> )                            | -0.5V | 8743.1   | 96.4%  | 17 |
| NiCu@TiO <sub>2</sub>   | 0.1 M NaOH<br>(0.1 M NO <sub>2</sub> <sup>-</sup> )                            | -0.5V | 11712.49 | 96.25% | 18 |



## References

1. H. Wang, F. Zhang, M. Jin, D. Zhao, X. Fan, Z. Li, Y. Luo, D. Zheng, T. Li, Y. Wang, B. Ying, S. Sun, Q. Liu, X. Liu and X. Sun, *Mater. Today Phys.*, 2023, **30**, 100944.
2. X. Ji, C. Ma, F. Zhang, X. He, X. Fan, J. Li, Z. Li, L. Ouyang, L. Zhang, T. Li, D. Zhao, Y. Wang, J. Zhang, Z. Cai, S. Sun, A. A. Alshehri, Q. Lu and X. Sun, *ACS Sustainable Chem. Eng.*, 2023, **11**, 2686-2691.
3. H. Qiu, Q. Chen, X. An, Q. Liu, L. Xie, J. Zhang, W. Yao, Y. Luo, S. Sun, Q. Kong, J. Chen and X. Sun, *J. Mater. Chem. A*, 2022, **10**, 24969-24974.
4. Z. Ren, Q. Chen, J. Zhang, X. An, Q. Liu, L. Xie, W. Yao, X. Sun and Q. Kong, *Mater. Today Phys.*, 2023, **36**, 101162.
5. G. Wang, Q. Chen, X. An, Q. Liu, L. Xie, J. Zhang, W. Yao, X. Liu, S. Sun, X. Sun and Q. Kong, *Colloid. Surf. A*, 2023, **657**, 130549.
6. H. Qiu, Q. Chen and J. J. I. C. F. Zhang, *Inorg. Chem. Front.*, 2023, **10**, 3909-3915.
7. X. He, L. Hu, L. Xie, Z. Li, J. Chen, X. Li, J. Li, L. Zhang, X. Fang, D. Zheng, S. Sun, J. Zhang, A. Ali Alshehri, Y. Luo, Q. Liu, Y. Wang and X. Sun, *J. Colloid Interf. Sci.*, 2023, **634**, 86-92.
8. G. Wen, J. Liang, L. Zhang, T. Li, Q. Liu, X. An, X. Shi, Y. Liu, S. Gao, A. M. Asiri, Y. Luo, Q. Kong and X. Sun, *J. Colloid Interf. Sci.*, 2022, **606**, 1055-1063.
9. L. Ouyang, X. He, S. Sun, Y. Luo, D. Zheng, J. Chen, Y. Li, Y. Lin, Q. Liu, A. M. Asiri and X. Sun, *J. Mater. Chem. A*, 2022, **10**, 23494-23498.
10. Z. Cai, D. Zhao, X. Fan, L. Zhang, J. Liang, Z. Li, J. Li, Y. Luo, D. Zheng, Y. Wang, T. Li, H. Yan, B. Ying, S. Sun, A. A. Alshehri, H. Yan, J. Xu, Q. Kong and X. Sun, *Small*, 2023, **19**, 2300620.
11. Z. Ren, Q. Chen, X. An, Q. Liu, L. Xie, J. Zhang, W. Yao, M. S. Hamdy, Q. Kong and X. Sun, *Inorg. Chem.*, 2022, **61**, 12895-12902.
12. Z. Cai, C. Ma, D. Zhao, X. Fan, R. Li, L. Zhang, J. Li, X. He, Y. Luo, D. Zheng,

- Y. Wang, B. Ying, S. Sun, J. Xu, Q. Lu and X. Sun, *Mater. Today Energy*, 2023, **31**, 101220.
13. Q. Chen, X. An, Q. Liu, X. Wu, L. Xie, J. Zhang, W. Yao, M. S. Hamdy, Q. Kong and X. J. C. C. Sun, *Chem. Chem. Commun.*, 2022, **58**, 517-520.
  14. X. He, X. Li, X. Fan, J. Li, D. Zhao, L. Zhang, S. Sun, Y. Luo, D. Zheng, L. Xie, A. M. Asiri, Q. Liu and X. Sun, *ACS Appl. Nano Mater.*, 2022, **5**, 14246-14250.
  15. L. Ouyang, X. Fan, Z. Li, X. He, S. Sun, Z. Cai, Y. Luo, D. Zheng, B. Ying, J. Zhang, A. A. Alshehri, Y. Wang, K. Ma and X. Sun, *Chem. Commun.*, 2023, **59**, 1625-1628.
  16. D. Zhao, J. Liang, J. Li, L. Zhang, K. Dong, L. Yue, Y. Luo, Y. Ren, Q. Liu, M. S. Hamdy, Q. Li, Q. Kong and X. Sun, *Chem. Commun.*, 2022, **58**, 3669-3672.
  17. X. Fan, X. He, X. Ji, L. Zhang, J. Li, L. Hu, X. Li, S. Sun, D. Zheng, Y. Luo, Y. Wang, L. Xie, Q. Liu, B. Ying and X. Sun, *Inorg. Chem. Front.*, 2023, **10**, 1431-1435.
  18. L. Cai, A. Zhang, Y. Liang, X. Fan, X. He, C. Yang, L. Ouyang, D. Zheng, S. Sun, Y. Luo, Q. Liu, S. Alfaifi, A. Farouk, M. S. Hamdy, W. Zheng, Q. Kong and X. Sun, *Mater. Today Energy*, 2023, **38**, 101428.
